# Supplementary material for: Electrochemical Biosensor to Detect Implant Derived Metal Ions: A Mice Model
Source: Research Square preprint supplement (doi:10.21203/rs.3.rs-2191799/v1), 2022-10-31
Supplement: Supplementary file 1 [file 575e2130ac11e271aca75ec8.pdf]

**Table 1:** Predicted concentrations for the blind study validations along with their accuracy levels.

|                   | Pre-set<br>concentration | Rp estimation | Zmod<br>estimation | CV Area<br>estimation |
|-------------------|--------------------------|---------------|--------------------|-----------------------|
|                   | 45 µg/mL                 | 44.01 µg/mL   | 30.7692 µg/mL      | 35.5 µg/mL            |
| <b>Accuracy %</b> |                          | 97.7%         | 68.37%             | 78.88%                |
